# Supplementary material for: Pharmacological and Epigenetic Regulators of NLRP3 Inflammasome Activation in Alzheimer’s Disease
Source: MDPI journal article supplement (doi:10.3390/ph14111187), 2021-11-20
Supplement: s1 [file s1]

# Supplementary data

|                                      | AD            |        |                 | HC            |        |                 |
|--------------------------------------|---------------|--------|-----------------|---------------|--------|-----------------|
| mRNA expression<br>( <i>n-fold</i> ) | N             | Median | IQR             | N             | Median | IQR             |
|                                      | 20            |        |                 | 10            |        |                 |
| Nlrp3                                | Med           | 0,25   | 0,021 - 0,882   | Med           | 0,23   | 0,032 - 0,782   |
|                                      | LPS+A $\beta$ | 2,09*  | 1,177 - 3,183   | LPS+A $\beta$ | 1,065* | 0,880 - 1,540   |
| ASC                                  | Med           | 0.12   | 0,051 - 0,962   | Med           | 0,45   | 0,403 - 0,662   |
|                                      | LPS+A $\beta$ | 0,69*  | 0,462 - 0,768   | LPS+A $\beta$ | 0,95*  | 0,600 - 0,970   |
| Caspase-1                            | Med           | 1,09   | 0,470 - 2,025   | Med           | 5,41   | 3,430 - 5,970   |
|                                      | LPS+A $\beta$ | 2,29*  | 0,890 - 2,325   | LPS+A $\beta$ | 19,35* | 17,620 - 25,37  |
| IL-1 $\beta$                         | Med           | 5,71   | 3,765 - 8,709   | Med           | 0,56   | 0,400 - 1,040   |
|                                      | LPS+A $\beta$ | 15,91* | 13,265 - 21,809 | LPS+A $\beta$ | 2,205* | 1,500 - 5,240   |
| IL-18                                | Med           | 12,008 | 11,143 - 15,891 | Med           | 2,24   | 1,163 - 2,892   |
|                                      | LPS+A $\beta$ | 55,52* | 51,365 - 58,256 | LPS+A $\beta$ | 14,56* | 12,863 - 18,682 |

|                               | AD            |         |                   | HC            |         |                   |
|-------------------------------|---------------|---------|-------------------|---------------|---------|-------------------|
| Protein production<br>(pg/ml) | N             | Median  | IQR               | N             | Median  | IQR               |
|                               | 20            |         |                   | 10            |         |                   |
| Caspase-1                     | Med           | 9.69    | 8,910 - 12,890    | Med           | 11.58   | 11,910 - 18,890   |
|                               | LPS+A $\beta$ | 39.04*  | 29,884 - 38,321   | LPS+A $\beta$ | 35.72*  | 24,585 - 36,541   |
| IL-1*                         | Med           | 4.99    | 12,980 - 16,230   | Med           | 6.65    | 3,980 - 5,230     |
|                               | LPS+A $\beta$ | 388.65* | 319,420 - 409,187 | LPS+A $\beta$ | 328.00* | 309,420 - 400,187 |
| IL-18                         | Med           | 7.08    | 2,980 - 6,230     | Med           | 3.05    | 2,980 - 6,230     |
|                               | LPS+A $\beta$ | 53.36*  | 11,910 - 21,890   | LPS+A $\beta$ | 33.65*  | 26,884 - 35,321   |

MED = UNSTIMULATED CELL (MEDIUM ALONE); AD= ALZHEIMER'S DISEASE PATIENTS; HC= HEALTHY CONTROL; \*= p < 0.05
